# Supplementary material for: Diminished responses to bodily threat and blunted interoception in suicide attempters
Source: eLife. 2020 Apr 7;9:e51593. doi: 10.7554/eLife.51593 (PMC7138608; doi:10.7554/eLife.51593)
Supplement: Figure 1—source data 1. [file elife-51593-fig1-data1.csv]

id	Group	bh_post_o2_0_calibrated	bh_post_co2_0_calibrated	bh_post_o2_2_calibrated	bh_post_co2_2_calibrated	bh_hold_duration_0	bh_hold_duration_2	mean_hold_duration	mean_effort	mean_unpleas	mean_intens	mean_diff	mean_stress	mean_breathless	mean_urge	mean_suff	mean_suff.fear	mean_post_o2	mean_post_co2
1	YesSA	14.79925571	4.888347524	14.63649476	4.985567762	64	61.5	62.75	100	11	17.5	16.5	15	17	17.5	3.5	0	9.598745462	4.936957643
2	NoSA	16.05047643	4.772764762	11.78528119	6.065910762	29	71	50	72.44094488	30.5	33.5	54.5	25	52.5	69.5	22	28	10.49652481	5.419337762
3	YesSA	NA	NA	NA	NA	NA	NA	NA	96.45669291	80.5	79	27	17	75	84	19.5	0	3.900599133	NA
4	NoSA	14.962015	5.00217281	14.22523405	5.127222048	27	33.5	30.25	81.88976378	84	79.5	67.5	63.5	26	85.5	31.5	6	9.47604341	5.064697429
5	NoSA	15.22940786	5.20933031	12.87955548	5.921806833	27	36	31.5	100	64.5	83.5	25	41.5	63	11	90	37.5	9.854447902	5.565568571
6	NoSA	12.14204524	5.60182619	17.86336429	5.470491714	73	60	66.5	87.00787402	71	66.5	41	17	50	35.5	8	4.5	8.015550748	5.536158952
7	NoSA	12.362935	5.460626476	13.34821595	5.452488667	49	69	59	93	90.5	62	82.5	40	82	90.5	11	0	8.326330162	5.456557571
8	NoSA	10.85124375	6.494001305	9.914424389	6.257496593	56	48	52	75	85.5	89	91	82	76	84	86	91.5	7.680730071	6.375748949
9	YesSA	15.18726429	5.12253281	15.3776381	5.02731081	33	32	32.5	75	63.5	54.5	49.5	20.5	31	82	5	4	9.626635619	5.07492181
10	YesSA	12.022155	5.614230238	12.8563031	5.23163419	48	75	61.5	92	67	80.5	71	33.5	95	99.5	88.5	25.5	7.886320238	5.422932214
11	NoSA	12.34001617	5.976876547	8.639442457	6.509724623	41	48	44.5	69	40	58.5	60	52	41	67	14	3	8.369921792	6.243300585
12	YesSA	11.36384643	7.0445425	12.02942119	6.547287548	61	81	71	81	91	95.5	64.5	61.5	87	91	88.5	27.5	7.724153707	6.795915024
13	NoSA	12.76585929	5.955449881	12.31939061	6.108912529	40	63	51.5	86.5	96	95.5	68.5	48.5	78	95	38.5	52.5	8.624711251	6.032181205
14	NoSA	12.84685714	5.612688238	12.46902	5.603387524	73	82	77.5	90.5	87	78.5	75	82	79.5	80	68	81.5	8.561299652	5.608037881
15	NoSA	12.78051963	5.958365762	14.11329612	5.568330876	35	26	30.5	49.5	2	5.5	0	1.5	10	5.5	2.5	2.5	8.453431749	5.763348319
16	NoSA	14.74727559	5.354237333	13.01454822	5.868826666	38	44	41	76.5	60	73	9.5	3.5	25	29.5	11	1.5	9.495656145	5.611532
17	NoSA	10.65257786	6.351401861	10.90242452	6.169097926	62	58	60	73	77	95.5	67	31.5	56.5	75.5	53	50	7.495158751	6.260249894
18	NoSA	15.25491295	4.871702984	14.44156995	5.365744024	20	48	34	75.5	91.5	92.5	37.5	0.5	85	91	83	2	9.720325389	5.118723504
19	NoSA	15.55075444	5.389852857	12.80738009	6.4377996	30	70	50	89	83.5	83.5	64	53.5	64	79	5	0	9.864429207	5.913826229
20	NoSA	11.19746802	6.673553707	10.83637751	6.902524429	72	65	68.5	88	86	77.5	55.5	51	43	38.5	62	2	7.953486587	6.788039068
21	NoSA	10.0354374	6.585635243	14.47353578	5.779500136	40	29	34.5	75.5	54	84	72.5	58	71	74.5	11.5	12	7.36337082	6.182567689
22	NoSA	11.98910036	6.666254015	11.52880672	6.581859192	86	106	96	100	87	99.5	81.5	65	100	100	14	0	8.183023318	6.624056604
23	NoSA	9.546802672	6.682957292	8.879756586	6.389626935	95	118	106.5	100	90	91.5	64	50	64	85.5	55.5	0.5	6.764538217	6.536292114
24	NoSA	13.29088688	6.066221788	13.02777388	6.008990912	32	31	31.5	96.5	78	78	90.5	62	88	93.5	72.5	37.5	8.940812578	6.03760635
25	YesSA	14.17980327	6.147261472	12.67413587	6.560716608	40	49	44.5	77	85.5	68	77	67.5	66.5	66.5	33	10.5	9.6857225	6.35398904
26	NoSA	12.8099391	5.677942149	13.71815785	5.536583753	47	59	53	87.5	76	57	48	19.5	65.5	85	10.5	0.5	8.565952723	5.607262951
27	YesSA	11.18578086	7.128069989	10.44301255	7.242448833	84	104	94	89.5	89.5	67.5	32.5	15	82	77.5	60.5	1	8.16570209	7.185259411
28	YesSA	10.11783245	7.014608073	11.33872077	6.821374625	36	57	46.5	99	63.5	76.5	29.5	22.5	27.5	77	14.5	9	7.734011216	6.917991349
29	NoSA	12.87202065	5.408296943	11.2984519	5.552506228	53	63	58	78	69	64	81.5	87.5	88	89.5	44	0.5	8.530942705	5.480401586
30	NoSA	10.7051792	6.299477434	11.73878207	5.903609415	52	57	54.5	90.5	58.5	42	67.5	16	54.5	84	9.5	3	7.653492332	6.101543424
31	YesSA	11.17918367	6.647794416	11.39124495	6.345676205	38	41	39.5	86.5	67.5	71	45	10.5	22.5	55.5	2.5	0	7.720538479	6.496735311
32	NoSA	15.2623833	5.12179406	14.3478348	5.321614096	20	35	27.5	76	61.5	79.5	76.5	72	70	74.5	45	29	10.12487843	5.221704078
33	YesSA	13.3333376	5.895615139	13.15058586	5.894629751	40	49	44.5	95	94	86.5	88	60.5	77.5	100	62.5	0.5	8.936922387	5.895122445
34	NoSA	14.64405878	5.563340555	14.86210263	5.249225949	26	25	25.5	50	38	49.5	34	19	59.5	71.5	43.5	3.5	9.501384604	5.406283252
35	YesSA	11.15463506	6.585536093	10.76023888	6.476674537	84	86	85	72.5	60.5	61	61.5	7	57	68.5	52.5	0	8.04817165	6.531105315
36	NoSA	15.0516559	5.539035633	14.45120616	5.674173113	19	27	23	80.5	92.5	88.5	71	79	97	94	98	80	9.81272881	5.606604373
37	NoSA	12.27520658	6.369807882	12.1387576	6.389654311	43	53	48	88	75.5	42	12	0.5	15.5	55	0	0.5	8.435130334	6.379731097
38	YesSA	NA	NA	NA	NA	37	36	36.5	62.5	47.5	61.5	50	43	47.5	64	33.5	43	NA	NA
39	NoSA	16.64010623	4.214902275	15.48692106	4.683248341	10	14	12	76	71.5	66.5	43	63.5	61.5	57	46	40.5	10.29066802	4.449075308
40	NoSA	13.11234402	6.040103521	12.17711055	6.067417085	13	14	13.5	50	49.5	50	50	50	50	50	50	50	8.933348594	6.053760303
41	NoSA	12.06153864	6.345939407	10.50176763	6.824225359	68	84	76	87	88	86	80.5	55	98	98.5	77.5	14	8.373164821	6.585082383
42	NoSA	11.48283847	6.471604842	12.72824843	6.180237832	59	56	57.5	93.5	77.5	75.5	27	26	82	48.5	23	15	8.031288661	6.325921337
43	NoSA	14.57818454	5.633287469	14.53588663	5.616243556	28	31	29.5	71	73.5	83.5	78	50	84	93.5	65	0	9.576148128	5.624765513
44	NoSA	14.39360504	5.702029769	13.21238736	6.030565449	26	34	30	75.5	61.5	52	50	50	52	50	26	29	9.297861016	5.866297609
45	NoSA	15.98765239	5.412189618	13.47358146	6.327223286	22	39	30.5	81	74.5	72	71	70.5	64.5	78.5	54	14	10.25999152	5.869706452
46	NoSA	15.48849376	4.85405071	16.42096531	4.421434873	10	10	10	75	69.5	72	27.5	39	73.5	51	6.5	0	9.580391783	4.637742792
47	NoSA	13.6170619	5.39369119	13.70280143	5.279795333	65	75	70	83	68.5	68	52	51.5	74.5	72	31.5	8.5	8.463764369	5.336743262
48	NoSA	11.54804767	5.841939948	11.66240714	6.048553961	61	65	63	75	82	84	65	36.5	51.5	57.5	33	0	7.849837884	5.945246955
49	NoSA	12.47047567	5.992991717	11.04118811	6.261589796	40	58	49	75.5	39	52	9.5	41.5	15	31	3.5	0	8.169950853	6.127290757
50	NoSA	13.14917747	4.989472201	14.791589	4.416107681	63	63	63	87.5	79.5	88	77.5	70	69	82	50	39	8.606722136	4.702789941
51	NoSA	13.96247627	5.83058339	12.91393683	5.9441346	41	44	42.5	63	84	66	81	55.5	95	86.5	70.5	46	9.30030213	5.887358995
52	YesSA	10.38862144	6.624771906	10.61825746	6.499286053	89	90	89.5	86	86.5	86	73	25	35	91	33	2.5	7.315621833	6.56202898
53	YesSA	12.2726192	6.013577703	11.82930468	5.99130083	59	60	59.5	78.5	50	49	50.5	50	84	62.5	66	59.5	8.287830124	6.002439267
54	NoSA	13.90176077	5.449427332	14.51066788	5.176047046	32	25	28.5	94.5	83.5	72	68	62.5	71.5	81	80	1.5	8.855164188	5.312737189
55	YesSA	NA	NA	NA	NA	33	47	40	85.5	80.5	79.5	37.5	61.5	86.5	86	85	20	NA	NA
56	YesSA	NA	NA	NA	NA	NA	84	84	49.5	44	41.5	65	66.5	52.5	47.5	32.5	23	NA	NA
57	YesSA	13.91217812	5.353771251	13.54471449	5.492926588	36	37	36.5	70.5	79	84.5	60	28	50.5	85	7.5	0	9.153060804	5.423348919
58	YesSA	13.10516077	4.861215239	15.6031868	4.098546443	33	31	32	95	91	88	62	81.5	91.5	94.5	82	49	8.22159403	4.479880841
59	NoSA	13.64716411	5.435240516	13.92283476	5.290009096	31	47	39	75	47.5	15.5	15	13.5	8.5	40	8	0	8.985272394	5.362624806
60	NoSA	14.71370568	5.244676357	14.27303825	5.192019394	25	35	30	58.5	76	70.5	92.5	77	78	90	61	54.5	9.594958367	5.218347876
61	NoSA	11.66779579	6.703329616	11.44143362	7.096700573	42	63	52.5	75.5	80	81.5	67	27	70.5	88	74.5	13.5	8.509642856	6.900015094
62	NoSA	12.6516181	6.107470768	9.977752183	6.669727331	44	71	57.5	87	81.5	81.5	50.5	63.5	71	72.5	61	23	8.657455593	6.38859905
63	NoSA	16.59441344	4.483371616	15.53637456	4.810069289	24	13	18.5	78.5	8	32	27.5	30	10.5	50	2.5	5.5	10.31563411	4.646720453
64	YesSA	10.89481897	6.33890822	12.05589402	6.128286863	88	83	85.5	85.5	60.5	80	34.5	21.5	51.5	34.5	25	7	7.717479593	6.233597541
65	YesSA	16.22629255	5.251878482	14.92023822	5.535170189	17	13	15	70.5	76	79.5	71.5	61	72	65.5	65.5	50	10.01198697	5.393524335
66	YesSA	10.83657238	6.685206297	10.50251355	6.714116482	53	51	52	91	76	83.5	63.5	53.5	61	85.5	44.5	6	7.806229136	6.69966139
67	YesSA	12.68720941	6.124018266	13.10475876	5.868755417	23	37	30	63	66.5	61.5	55.5	59	57	56	54	40	8.543161438	5.996386841
68	NoSA	13.86199642	5.807489927	14.19917196	5.655192163	24.5	35	29.75	86.5	88	85	81.5	79	74.5	75.5	50.5	1	9.287944318	5.731341045
69	NoSA	11.74554605	5.97805997	12.9369766	5.780894893	36	49	42.5	87	73.5	77	74	70.5	61	70	74	84.5	8.089877485	5.879477431
70	YesSA	12.72673614	6.337228077	NA	NA	47	54	50.5	87	88	86.5	100	25.5	94	99	5.5	4	8.486439806	6.337228077
71	YesSA	12.38742777	6.462226512	NA	NA	27	46.5	36.75	63	56	50.5	49	49.5	49.5	49.5	48.5	50.5	8.625508058	6.462226512
72	NoSA	14.93773516	4.864461194	13.78521519	5.353598392	16	35	25.5	100	100	99.5	0	0.5	99	100	77	0	9.453168345	5.109029793
73	YesSA	12.0012273	6.239682278	11.18232042	6.48511543	48	92	70	82	69	76	13	35	79.5	73	3.5	0	8.422229427	6.362398854
74	NoSA	13.16272211	5.626892667	12.52509945	2.817967619	54	57	55.5	70	62.5	69.5	60.5	55.5	58	63.5	25	15	8.172473018	4.222430143
75	YesSA	12.69812218	5.909268431	12.38012232	6.158233731	43	70	56.5	79	75.5	73.5	75.5	61	76	73.5	62	29.5	8.576457501	6.033751081
76	YesSA	11.11026143	7.035428048	11.89354619	6.805710619	54	48	51	89.5	77	77	60.5	56.5	71	78.5	68	0	8.149847857	6.920569333
77	YesSA	NA	NA	11.65583579	6.531649632	83	80	81.5	87.5	63.5	58.5	50	50	50	57.5	26	0	4.673882528	6.531649632
78	YesSA	NA	NA	NA	NA	90	17	53.5	99.5	99.5	99.5	99.5	98.5	98.5	98.5	99	99	NA	NA
79	NoSA	13.38058158	6.09518981	12.93429906	6.094208857	67	71	69	75	80	67.5	56.5	63.5	50	69	60.5	40.5	8.519220701	6.094699333
80	NoSA	13.92236061	6.394038311	12.94859387	6.740632421	44	51	47.5	75.5	80	75.5	48.5	41	59.5	74.5	61.5	0.5	9.710213695	6.567335366
81	NoSA	10.98624401	6.467978763	12.0412087	6.158865494	69	73	71	79.5	70.5	58	44.5	8.5	78	38	39	10.5	7.925536949	6.313422129
82	NoSA	13.2338685	6.82710919	12.06867307	6.653013619	66	50	58	69.5	25	48.5	0.5	9	37.5	77.5	8.5	0.5	8.926355574	6.740061405
83	YesSA	NA	NA	NA	NA	NA	NA	NA	NA	NA	NA	NA	NA	NA	NA	NA	NA	NA	NA
84	NoSA	10.81581029	5.746576319	10.51134863	5.784960115	102	120	111	87.5	64	59.5	57	51.5	41	57	5	2.5	7.533105472	5.765768217
85	NoSA	15.79788942	5.467950762	14.90129788	5.68524319	25	47	36	87	56.5	50	58	53	51	50	56.5	50	10.08789433	5.576596976
86	NoSA	12.64365303	6.337204766	11.63886804	6.181439235	37	45	41	73.5	59.5	50	64.5	59.5	77	70	77	57.5	8.379799074	6.259322
87	NoSA	14.00323019	5.550188107	13.68102603	5.621703088	52	54	53	30	12.5	34	29.5	29	44.5	33	41	31.5	9.13799207	5.585945597
88	YesSA	12.09116993	6.248219857	10.93034285	6.594340143	94	109	101.5	93	93.5	81	57.5	59.5	64.5	60.5	51	40	8.041147557	6.42128
89	NoSA	16.06193257	4.868126722	14.78744905	5.279600399	15	24	19.5	66	56.5	54.5	38.5	44	52.5	62.5	43	46.5	10.15796252	5.073863561
90	YesSA	13.38805267	6.107652143	13.55514223	6.041530619	32	53	42.5	75.5	59.5	69.5	60.5	40	56.5	86	46.5	42.5	9.037446765	6.074591381
91	NoSA	12.24265904	7.019115667	12.1591821	6.991722619	41	47	44	99.5	96	95.5	90.5	79	97.5	98.5	83.5	12.5	8.747534299	7.005419143
92	NoSA	12.1482198	6.345725571	11.78557539	6.267724048	44	52	48	81	67.5	56.5	50	0	0	82.5	0	0	8.519237405	6.30672481
93	NoSA	11.9284219	6.250109095	12.74803762	6.07208981	23	34	28.5	96	86	77	59.5	60	71.5	79.5	37	41.5	8.43919381	6.161099452
94	YesSA	10.09955348	6.696337714	8.720449524	6.756682571	88	110	99	94.5	78	78	63	65	78	30	39	8	7.101340929	6.726510143
95	NoSA	12.6230361	6.561751667	11.89786849	6.619444333	22	31	26.5	82	88.5	83	9	29.5	74	91.5	53	12.5	9.017355518	6.590598
96	NoSA	14.9206	5.443464	12.94567524	5.747695048	32	47	39.5	92.5	98.5	89	81	65.5	86	97.5	89.5	33.5	10.06364465	5.595579524
97	NoSA	15.93872292	5.150402635	13.12451864	5.89532398	24	36	30	82.5	66	73	62	61.5	46.5	56	53.5	60.5	9.950345795	5.522863307
98	YesSA	14.45967336	5.984019762	14.80502111	5.970250524	35	31	33	89	74	77	71	76	81.5	86	74	69.5	9.938076707	5.977135143
99	NoSA	11.57410884	6.376364084	12.42110026	6.202413281	49	41	45	80.5	43	71	30.5	11	75.5	95.5	82	29	8.316317723	6.289388683
100	NoSA	13.03205926	6.347208759	12.56430371	5.969928235	34	47	40.5	81.5	67	75	52	53.5	66	81	83	51	9.005940296	6.158568497
101	NoSA	11.99946655	7.004915384	10.74843553	7.301005999	76	106	91	93	91.5	89.5	11.5	9.5	93.5	96.5	75	0	8.810033814	7.152960692
102	NoSA	11.58314661	6.276079714	12.28452391	6.060349429	81	54	67.5	75	75	75	50	50	74	75	50	0	7.865668681	6.168214571
