# Supplementary material for: Diminished responses to bodily threat and blunted interoception in suicide attempters
Source: eLife. 2020 Apr 7;9:e51593. doi: 10.7554/eLife.51593 (PMC7138608; doi:10.7554/eLife.51593)
Supplement: Figure 2—source data 1. [file elife-51593-fig2-data1.csv]

id	Group	cp_time_to_peak_pain_corrected	cp_time_to_mild_pain_corrected	cp_time_to_moderate_pain_corrected	cp_time_hand_in_water	cp_unpleasantness	cp_difficulty	cp_stressful	cp_peak_pain
1	YesSA	33.63940626	33.17191647	33.37227575	38.83092377	57	61	14	70.8661417
2	NoSA	24.79132292	9.182130548	12.35402514	49.37579404	97	67	39	88.1889764
3	YesSA	44.9581319	9.048450495	13.97337649	126.0219018	70	28	50	75.5905512
4	NoSA	22.60448424	6.444294545	21.86981348	47.79988403	84	75	74	60.6299213
5	NoSA	22.18686245	9.36566342	14.02340296	27.11730398	100	1	0	100
6	NoSA	101.552116	58.34720426	85.80941768	126.100536	67	61	57	56.6929134
7	NoSA	30.35036199	2.754677185	3.105381008	123.304049	96	44	55	92.1259843
8	NoSA	3.42238447	2.136881443	2.721259265	56.42549548	99	100	100	100
9	YesSA	NA	NA	NA	54.288	67	38	10	NA
10	YesSA	34.49051249	0.016824241	34.20706315	124.6425696	50	26	31	71.6535433
11	NoSA	12.95514592	11.10196323	11.10196323	22.68163696	89	88	87	81.1023622
12	YesSA	91.36880142	28.7319316	91.36880142	125.8545764	81	74	29	50.3937008
13	NoSA	9.950065844	2.237231574	4.991758324	126.7663343	42	40	34	59.8425197
14	NoSA	35.5257005	0.16705331	0.16705331	44.98679643	85	87	77	95.2755906
15	NoSA	20.06655789	19.9163407	19.9163407	41.64548283	91	0	50	81.8897638
16	NoSA	12.97174955	10.45083149	11.5026074	44.29019765	74	83	81	62.992126
17	NoSA	6.560048228	6.493682323	6.493682323	60.37348933	94	76	50	97.6377953
18	NoSA	16.31054657	6.177150819	8.430857112	38.55362869	100	100	36	100
19	NoSA	16.39412673	7.863215281	10.23392432	25.45508445	95	100	94	85.8267717
20	NoSA	102.0196571	31.51927782	55.19199015	125.9476187	94	91	100	77.1653543
21	NoSA	17.56264756	11.56933633	16.2771908	66.59279891	100	98	95	88.1889764
22	NoSA	89.28170653	20.66761748	28.12991091	118.1709242	75	71	94	72.4409449
23	NoSA	27.07870749	10.28399133	14.64125839	34.41881622	100	96	22	98.4251969
24	NoSA	27.46233733	19.49917778	24.40723061	31.63096096	80	82	64	75.5905512
25	YesSA	47.71285972	1.602777632	7.879858954	124.0313689	88	74	38	66.1417323
26	NoSA	48.28052136	1.819880092	1.970125322	72.34519043	100	100	30	99.2125984
27	YesSA	NA	NA	NA	NA	NA	NA	NA	NA
28	YesSA	73.80544784	6.794681941	9.565941319	124.9770868	60	65	16	78.7401575
29	NoSA	29.34880464	5.926833503	6.794871517	33.34894721	100	95	92	84.2519685
30	NoSA	71.45187666	21.4191731	22.28703573	78.94726507	96	95	14	76.3779528
31	YesSA	7.445897228	1.719700164	4.975233206	18.32927546	95	77	31	74.8031496
32	NoSA	19.28224348	8.480975123	10.18364728	23.94862728	96	97	99	99.2125984
33	YesSA	84.69080626	27.01169598	48.28028136	126.5258068	64	11	1	55.1181102
34	NoSA	13.15537393	5.659536841	9.082025215	22.55876284	87	90	51	78.7401575
35	YesSA	NA	NA	NA	NA	NA	NA	NA	NA
36	NoSA	47.49579405	4.975293433	5.592851549	52.66193879	90	90	93	75.5905512
37	NoSA	32.70451306	4.6745652	31.55261268	46.14794521	89	78	99	74.8031496
38	YesSA	NA	NA	NA	NA	NA	NA	NA	NA
39	NoSA	22.65443622	15.67623048	16.02678609	27.46379744	90	33	18	81.8897638
40	NoSA	43.92322351	20.48437029	33.03843914	48.2401742	100	63	91	100
41	NoSA	32.17025576	14.99176258	30.98514196	39.55086074	100	100	99	74.8031496
42	NoSA	11.26885186	8.030174034	8.464154292	16.55871104	87	73	79	94.488189
43	NoSA	51.01793133	11.33563048	30.11666184	87.30960328	75	1	1	69.2913386
44	NoSA	12.5877032	7.846430065	10.46755907	26.7193472	71	75	72	70.8661417
45	NoSA	45.02457301	7.846461973	23.50560876	49.34161641	95	95	94	65.3543307
46	NoSA	11.76971728	7.328774036	9.782848637	21.21453267	85	78	78	70.8661417
47	NoSA	55.69234412	13.4388989	23.62248118	65.44825556	88	85	93	85.0393701
48	NoSA	35.24153613	7.095275973	13.83942104	39.33962654	95	71	75	100
49	NoSA	56.11019895	11.786491	11.786491	125.2474278	88	99	99	100
50	NoSA	42.6541929	16.09365716	33.67260063	60.51253368	91	100	100	62.992126
51	NoSA	40.35052369	18.91493499	39.39894382	101.8083575	95	68	44	55.9055118
52	YesSA	36.22679119	18.89832071	34.85787678	39.19511468	100	74	61	56.6929134
53	YesSA	50.43370697	46.61063626	46.61063626	64.44890922	91	93	84	85.0393701
54	NoSA	24.29055982	2.504295189	2.688043064	32.10683944	96	98	100	100
55	YesSA	37.19493876	12.53756089	26.02650134	53.21197794	93	75	76	70.0787402
56	YesSA	51.29593229	1.881147702	23.28302759	119.845	71	62	57	73.2283465
57	YesSA	30.36698571	9.949836752	11.23523812	51.18030252	77	63	50	70.0787402
58	YesSA	43.38874279	12.78799321	19.14863688	60.0603935	100	94	87	85.0393701
59	NoSA	28.2635388	3.288904671	3.956559397	37.34075767	88	100	95	98.4251969
60	NoSA	11.01837124	3.9400108	4.040430808	32.50584609	57	48	68	69.2913386
61	NoSA	5.70947682	5.292191583	5.292191583	23.31576145	91	93	30	62.992126
62	NoSA	91.88594535	23.48909931	52.57067782	126.7378889	100	85	93	77.9527559
63	NoSA	31.56908025	3.172254599	3.172254599	42.34303836	93	94	79	85.0393701
64	YesSA	23.70608442	8.981622775	14.39057256	27.79776951	91	81	14	100
65	YesSA	23.87316577	6.22734373	8.84822806	46.31734542	83	82	50	81.8897638
66	YesSA	53.8391831	6.310559399	19.01483344	127.241673	89	23	62	89.7637795
67	YesSA	16.27727412	4.140156789	4.657792423	27.99042056	70	81	70	97.6377953
68	NoSA	54.75169442	6.422948851	28.54364201	57.69763033	94	69	76	85.8267717
69	NoSA	20.10020273	12.05350504	16.42730387	39.8892558	100	100	27	100
70	YesSA	NA	NA	NA	NA	NA	NA	NA	NA
71	YesSA	18.13035388	4.824920906	4.992154021	23.80491597	91	81	70	100
72	NoSA	17.86333598	8.39738973	13.12205573	23.60216147	100	100	0	97.6377953
73	YesSA	15.70405777	11.19655719	13.98463592	29.333	100	99	59	75.5905512
74	NoSA	55.27547342	13.63986641	29.29886139	61.75273468	90	50	8	100
75	YesSA	22.01996562	3.071884224	4.106968467	126.7794464	100	100	99	100
76	YesSA	28.88136271	7.245444681	10.43400518	36.09374897	100	100	91	85.0393701
77	YesSA	NA	NA	NA	NA	NA	NA	NA	NA
78	YesSA	67.32041047	40.90985534	65.417186	122	99	98	98	74.8031496
79	NoSA	41.50219725	7.212118232	23.58932197	97.06265417	78	67	71	76.3779528
80	NoSA	15.67611466	5.559524268	13.1051541	23.56166655	82	80	17	76.3779528
81	NoSA	14.85814686	0.033430088	11.13528299	124.8774921	23	13	21	82.6771654
82	NoSA	40.26706313	9.84992241	24.55773041	67.94867307	83	85	1	81.1023622
83	YesSA	NA	NA	NA	NA	NA	NA	NA	NA
84	NoSA	90.61682378	6.477463458	40.76757923	122.5508757	84	85	50	74.8031496
85	NoSA	56.91112458	54.924524	56.67746389	110.1165696	71	50	50	56.6929134
86	NoSA	21.53696777	6.773075545	10.84368378	26.01926369	100	90	89	100
87	NoSA	106.9271263	9.065112722	18.6309496	123.473427	78	66	68	70.0787402
88	YesSA	NA	NA	NA	NA	NA	NA	NA	NA
89	NoSA	61.66845529	12.11978168	13.12144495	80.72141455	97	100	86	85.8267717
90	YesSA	9.716370699	2.570958929	3.97329516	24.66289387	98	78	81	72.4409449
91	NoSA	45.92618519	15.34229268	22.85460584	51.19801582	99	93	78	100
92	NoSA	42.08650377	12.53825339	33.07150844	46.1784182	91	77	2	75.5905512
93	NoSA	17.69618898	2.737996641	6.611068901	21.54440927	100	98	85	96.0629921
94	YesSA	117.4790503	7.061920406	23.10541582	123.0500904	88	93	66	90.5511811
95	NoSA	43.9567435	14.02356623	18.94854654	45.85512375	100	93	78	99.2125984
96	NoSA	41.98652499	8.080743453	17.14526808	45.90104051	99	99	89	100
97	NoSA	9.983367731	2.103781619	8.664621916	17.8414566	87	100	82	81.8897638
98	YesSA	70.96798173	10.016736	34.74114113	75.45942758	89	73	88	88.976378
99	NoSA	27.69293299	5.13839287	10.41074592	35.83366752	88	52	8	89.7637795
100	NoSA	23.4723122	5.926424917	8.99829338	32.85494004	98	98	99	100
101	NoSA	39.56580982	23.08847514	24.22363543	41.78011706	100	100	50	74.8031496
102	NoSA	75.40816688	38.31366951	55.47519728	126.6276089	100	49	66	76.3779528
