# Supplementary material for: Diminished responses to bodily threat and blunted interoception in suicide attempters
Source: eLife. 2020 Apr 7;9:e51593. doi: 10.7554/eLife.51593 (PMC7138608; doi:10.7554/eLife.51593)
Supplement: Figure 3—source data 1. [file elife-51593-fig3-data1.csv]

id	Group	t0_counting_accuracy	t1_counting_accuracy	t2_counting_accuracy	t3_counting_accuracy	heart_acc_avg	heart_avg_diff	heart_avg_conf	heart_avg_intens	mean_t2t3intens	mean_t2t3conf	mean_t2t3diff	mean_t2t3acc
1	YesSA	0.808988764	0.91025641	0.712643678	0.831325301	0.784319248	28.33333333	68.66666667	43.33333333	32	58	40	0.77198449
2	NoSA	0.65625	1	0.327868852	0.28125	0.421789617	51.33333333	16	12.33333333	14	10.5	68	0.304559426
3	YesSA	0.430379747	1	0	0.024096386	0.151492044	76	13	10.33333333	9	7.5	75	0.012048193
4	NoSA	0.604651163	1	0.776470588	0.816091954	0.732404568	37.33333333	77.66666667	77.33333333	79.5	81.5	41	0.796281271
5	NoSA	0.557142857	0.987179487	0.242857143	0.134328358	0.311442786	0.333333333	67.33333333	11.33333333	14.5	94.5	0.5	0.188592751
6	NoSA	-0.547945205	1	0.986842105	0.662337662	0.367078187	50.33333333	49.33333333	54.33333333	60.5	55.5	50	0.824589884
7	NoSA	0.569892473	1	0.47311828	0.423076923	0.488695892	66.33333333	31.66666667	60.66666667	74	43	61.5	0.448097602
8	NoSA	0.414634146	1	0.950617284	0.564102564	0.643117998	87.33333333	55.66666667	44.33333333	58	58.5	83	0.757359924
9	YesSA	-0.666666667	1	0.859649123	0.610169492	0.267717316	28.33333333	49	56.66666667	49.5	49	27.5	0.734909308
10	YesSA	0.387096774	1	0.15625	NA	0.271673387	82.5	18.5	29	NA	NA	NA	NA
11	NoSA	1	1	0.090909091	0.548387097	0.546432063	5	53	9.666666667	14	77	5	0.319648094
12	YesSA	0.963414634	0.935897436	0	0.211764706	0.391726447	53	25	6.333333333	9.5	37.5	51.5	0.105882353
13	NoSA	0.813333333	1	0.293333333	0.144927536	0.417198068	51.66666667	63.66666667	47.33333333	39.5	67.5	60	0.219130435
14	NoSA	0.454545455	1	0.218181818	0.5	0.390909091	82.66666667	42	25.66666667	32.5	38.5	86.5	0.359090909
15	NoSA	0.742424242	0.987179487	0.230769231	0.016666667	0.32995338	49.66666667	33.33333333	10	8	24.5	48	0.123717949
16	NoSA	0.929577465	1	0.071428571	0.6	0.533668679	40.33333333	31.66666667	44	41	32.5	35	0.335714286
17	NoSA	0.983606557	0.987179487	0.816666667	0.945945946	0.91540639	17.66666667	80	86	91.5	85	11	0.881306307
18	NoSA	0.629213483	1	0.35	0.5875	0.522237828	25	60	57.66666667	61.5	65	12.5	0.46875
19	NoSA	0.53	1	0.322916667	0.330434783	0.394450483	69.66666667	40	51.66666667	52.5	45	59.5	0.326675725
20	NoSA	0.892307692	1	0.287878788	0.278688525	0.486291668	53.33333333	54.33333333	59	54.5	52	56	0.283283657
21	NoSA	-0.164179104	1	1	0.533333333	0.456384743	56.33333333	43	32.66666667	28	42	62.5	0.766666667
22	NoSA	0.720588235	1	0.970149254	0.714285714	0.801674401	74	69.33333333	78.33333333	82.5	71	69.5	0.842217484
23	NoSA	0.7	0.987179487	0.384615385	0.111111111	0.398575499	80.33333333	52	12	9.5	53	85.5	0.247863248
24	NoSA	0.906666667	0.987179487	0.743589744	0.838709677	0.829655363	82	38.66666667	32	35.5	31.5	89	0.791149711
25	YesSA	0.909090909	1	0.119402985	0.217391304	0.415295066	79.66666667	23.66666667	15.66666667	10	12	87	0.168397145
26	NoSA	0.970149254	0.987179487	0.268656716	0.434782609	0.55786286	82.66666667	24	22	20.5	11	85.5	0.351719663
27	YesSA	0.861538462	1	0.451612903	0.909090909	0.740747425	60	75.33333333	42.66666667	56	76.5	60	0.680351906
28	YesSA	0.661538462	0.987179487	0.28358209	0.484848485	0.476656345	66.66666667	37.66666667	34	39.5	38	83	0.384215288
29	NoSA	0.944444444	1	0.753623188	0.681818182	0.793295272	61	42.33333333	52.33333333	48	38.5	62	0.717720685
30	NoSA	0.666666667	1	1	0.661290323	0.775985663	44.66666667	64.66666667	69	81.5	74	44	0.830645162
31	YesSA	0.052631579	0.961538462	0.680555556	0.472222222	0.401803119	47	29.33333333	36.66666667	55	44	46.5	0.576388889
32	NoSA	0.950980392	0.974358974	0.020618557	0.506024096	0.492541015	66.33333333	31.33333333	80.33333333	71	19.5	86	0.263321327
33	YesSA	0.958333333	1	0	0	0.319444444	90.66666667	1	2.333333333	1	0	94	0
34	NoSA	0.914285714	1	0.057142857	0.178082192	0.383170254	64.66666667	34	16.33333333	24.5	50.5	58.5	0.117612525
35	YesSA	0.941176471	1	0	0.385964912	0.442380461	64.33333333	27	21.66666667	31.5	31	65	0.192982456
36	NoSA	0.777777778	0.987179487	0.65060241	0.654320988	0.694233725	32.66666667	68.33333333	68.33333333	65	66.5	41	0.652461699
37	NoSA	0.695652174	1	0.031914894	0.108433735	0.278666934	83	26.33333333	8	3.5	24.5	90	0.070174315
38	YesSA	0.483516484	0.974358974	0.24137931	0.825581395	0.51682573	56.33333333	41	40.66666667	43.5	45.5	64	0.533480353
39	NoSA	0.985074627	1	0.235294118	0.533333333	0.584567359	51.66666667	38.33333333	42.66666667	39.5	32.5	52.5	0.384313726
40	NoSA	0.070422535	0.974358974	0.905405405	0.941176471	0.63900147	56.33333333	41.33333333	50	50	50	50	0.923290938
41	NoSA	0.333333333	1	0.941176471	0.732394366	0.668968057	42.66666667	37	46.66666667	52.5	45.5	39	0.836785419
42	NoSA	0.891566265	1	0.445783133	0.4375	0.591616466	46.66666667	44.66666667	62.66666667	62	40.5	42	0.441641567
43	NoSA	0.926470588	1	0.266666667	0.158730159	0.450622471	36.66666667	33.33333333	32	18.5	13	52.5	0.212698413
44	NoSA	0.45	0.961538462	0.459016393	0.196721311	0.368579235	58.66666667	34.33333333	37.33333333	37.5	38	54.5	0.327868852
45	NoSA	0.935897436	0.987179487	0.75308642	0.96	0.882994619	52.33333333	54.33333333	36.33333333	38.5	56.5	53.5	0.85654321
46	NoSA	0.568965517	0.974358974	0.046875	0.1	0.238613506	81	25	14.66666667	18	12.5	80	0.0734375
47	NoSA	0.666666667	1	0.117647059	0.178571429	0.320961718	66	42.33333333	38	37	39.5	70	0.148109244
48	NoSA	0.884057971	1	0.567164179	0.614285714	0.688502621	60	60.33333333	60.66666667	71.5	71.5	55.5	0.590724947
49	NoSA	0.862068966	1	0.5	0.483333333	0.6151341	84.66666667	36.66666667	43.33333333	44	36.5	88.5	0.491666667
50	NoSA	0.067567568	1	0.868421053	0.924050633	0.620013084	64.66666667	31	34.66666667	47	45	66	0.896235843
51	NoSA	0.985074627	1	0.861111111	0.391304348	0.745830029	56	33	53	52	31	62	0.62620773
52	YesSA	0.985074627	1	0.289855072	0.676056338	0.650328679	57.66666667	26.33333333	24.66666667	34.5	36	59.5	0.482955705
53	YesSA	0.984375	0.974358974	0.444444444	0.514705882	0.647841776	30	59	42.33333333	38	60	31.5	0.479575163
54	NoSA	0.376623377	0.974358974	0.103896104	0.4	0.293506494	66	41	28.66666667	41.5	47.5	51	0.251948052
55	YesSA	0.898734177	1	0.053333333	0.307692308	0.419919939	69	23.66666667	26	9.5	23.5	73.5	0.180512821
56	YesSA	0.5	1	0	0.888888889	0.462962963	10.66666667	69.33333333	26.66666667	29.5	85.5	11.5	0.444444445
57	YesSA	0.839285714	1	0.01754386	0.169491525	0.342107033	88.33333333	54	11	16	67.5	89	0.093517693
58	YesSA	0.868421053	0.987179487	0.067567568	0.537313433	0.491100684	38	49.33333333	16	11.5	41.5	56	0.302440501
59	NoSA	0.551724138	1	0.898305085	1	0.816676408	62.66666667	56.33333333	40.33333333	59	71.5	46.5	0.949152543
60	NoSA	0.757575758	0.987179487	0.396825397	0.306451613	0.486950922	65.66666667	31	41.33333333	39.5	35	67	0.351638505
61	NoSA	0.822580645	1	0.5	0.666666667	0.663082437	68.33333333	38.33333333	57	65.5	46.5	68.5	0.583333334
62	NoSA	0.373134328	0.961538462	0.434782609	0.642857143	0.48359136	49.66666667	55	50	52	60.5	58.5	0.538819876
63	NoSA	0.964285714	1	0.639534884	0.518072289	0.707297629	58.66666667	48.66666667	50.33333333	50	48	63	0.578803587
64	YesSA	0.803030303	1	0.863636364	0.6875	0.784722222	49	67.66666667	54.66666667	50.5	66	53.5	0.775568182
65	YesSA	0.608108108	0.948717949	0	0.368421053	0.32550972	78.66666667	32.66666667	20	17.5	36	88	0.184210527
66	YesSA	0.575342466	1	0	0	0.191780822	70	21.33333333	0	0	0	76.5	0
67	YesSA	0.474576271	1	0.448275862	0.682539683	0.535130605	67.66666667	9.666666667	38.33333333	34	9.5	64.5	0.565407773
68	NoSA	0.544117647	1	0.088235294	0.166666667	0.266339869	75	26.66666667	17.66666667	16.5	23	81.5	0.127450981
69	NoSA	0.833333333	0.987179487	0.467532468	0.662162162	0.654342654	50.33333333	37.33333333	66.66666667	71.5	36.5	55.5	0.564847315
70	YesSA	0.736842105	1	0.277777778	0.360465116	0.458361666	64.66666667	37.66666667	54.66666667	48	31.5	81.5	0.319121447
71	YesSA	0.014285714	0.012820513	0	0.223880597	0.07938877	54.66666667	76.33333333	76.33333333	82.5	81.5	57	0.111940299
72	NoSA	0.409836066	1	0.098360656	0.253968254	0.254054992	63.66666667	62.66666667	24.33333333	11.5	81	65.5	0.176164455
73	YesSA	0.620689655	1	0.172413793	0.230769231	0.341290893	64	44.33333333	18.33333333	20	34	58	0.201591512
74	NoSA	0.861111111	1	0.742857143	0.87012987	0.824699375	72	26.33333333	24.66666667	36	30.5	68	0.806493507
75	YesSA	0.569620253	0.987179487	0.12	0.630952381	0.440190878	61	30.33333333	35	27.5	32	69	0.375476191
76	YesSA	0.298245614	1	0.175438596	0.15625	0.20997807	55.66666667	50	13.33333333	20	50	63	0.165844298
77	YesSA	0.661290323	1	0.423728814	0.375	0.486673045	50	31	29.66666667	44.5	33.5	50	0.399364407
78	YesSA	NA	1	NA	NA	NA	NA	NA	NA	NA	NA	NA	NA
79	NoSA	0.788732394	1	0.164383562	0.113402062	0.355506006	66.66666667	22.66666667	24.66666667	37	19.5	66.5	0.138892812
80	NoSA	0.692307692	1	0.075	0.348837209	0.372048301	82.33333333	38.33333333	24.66666667	26.5	46	80.5	0.211918605
81	NoSA	0.85915493	1	0.662162162	0.276315789	0.59921096	73.33333333	27.66666667	37.33333333	28.5	16.5	78.5	0.469238976
82	NoSA	0.724137931	0.987179487	0.5	0.419354839	0.547830923	40.33333333	34.33333333	46.33333333	51.5	43	49	0.45967742
83	YesSA	NA	NA	NA	NA	NA	NA	NA	NA	NA	NA	NA	NA
84	NoSA	0.983050847	0.987179487	0.842105263	0.824561404	0.883239171	23	75	78.33333333	76.5	74.5	25	0.833333334
85	NoSA	0.649484536	1	0.226804124	0.423076923	0.433121861	72	54.66666667	46	40	53	75	0.324940524
86	NoSA	0.451219512	1	0.49382716	0.3125	0.419182224	76.33333333	25.33333333	12	16.5	13	71	0.40316358
87	NoSA	0.80952381	0.987179487	0.484848485	0.397590361	0.563987552	37	33	31	30.5	33.5	34	0.441219423
88	YesSA	0.975308642	0.987179487	0.590361446	0.253012048	0.606227379	25	53.66666667	54	48	55	29.5	0.421686747
89	NoSA	0.516129032	0.987179487	0.213114754	0.724637681	0.484627156	53	65.33333333	35.33333333	26.5	74.5	55	0.468876218
90	YesSA	0.762886598	0.961538462	0.428571429	0.361904762	0.517787596	60.66666667	52.33333333	14.66666667	15.5	53.5	66	0.395238096
91	NoSA	0.86746988	1	0.35443038	0.105263158	0.442387806	46	43.66666667	34	11.5	29	65	0.229846769
92	NoSA	0.652173913	0.987179487	0.171428571	0.38961039	0.404404291	89.33333333	3.666666667	12.66666667	17	5.5	84	0.280519481
93	NoSA	0.931034483	1	0.474576271	0.217391304	0.541000686	73.66666667	50	43	48.5	55.5	80.5	0.345983788
94	YesSA	0.3875	1	0.156626506	0.2125	0.252208835	62.33333333	28	51.33333333	47	37.5	49	0.184563253
95	NoSA	0.770833333	1	0.223404255	0.370786517	0.455008035	50.33333333	51	33	33.5	56.5	41	0.297095386
96	NoSA	0.894736842	1	0.283333333	0.567164179	0.581744785	61	40.66666667	30.33333333	41	49.5	66.5	0.425248756
97	NoSA	0.830985915	1	0.724637681	0.97260274	0.842742112	62	43.66666667	39.33333333	44	37.5	68	0.848620211
98	YesSA	0.931034483	1	0.954545455	0.588235294	0.824605077	46.66666667	53.33333333	53.66666667	46	47.5	52	0.771390375
99	NoSA	0.848837209	1	0.255813953	0.708860759	0.604503974	23	40	21	15	27	34	0.482337356
100	NoSA	0.8	1	0.843137255	0.620689655	0.75460897	62.33333333	54.33333333	48	47	48	82	0.731913455
101	NoSA	0.227272727	0.974358974	0.21875	0.581081081	0.342367936	26	27	23.33333333	35	40.5	14	0.399915541
102	NoSA	0.280701754	1	0.157894737	0.233333333	0.223976608	50	41	45	42	36.5	49.5	0.195614035
