# Supplementary material for: Diminished responses to bodily threat and blunted interoception in suicide attempters
Source: eLife. 2020 Apr 7;9:e51593. doi: 10.7554/eLife.51593 (PMC7138608; doi:10.7554/eLife.51593)
Supplement: Figure 4—source data 1. [file elife-51593-fig4-data1.csv]

id	Group	beta_dmIns_HvT	beta_postIns_HvT
1	YesSA	NA	NA
2	NoSA	NA	NA
3	YesSA	-0.047	0.0523
4	NoSA	0.0349	-0.044
5	NoSA	0.1458	0.0654
6	NoSA	0.0448	0.0491
7	NoSA	NA	NA
8	NoSA	-0.0215	0.1934
9	YesSA	-0.439	-0.5299
10	YesSA	-0.0579	-0.0959
11	NoSA	0.0162	0.6748
12	YesSA	0.0332	-0.0658
13	NoSA	0.1188	0.1831
14	NoSA	-0.0647	0.1369
15	NoSA	-6.00E-04	0.0267
16	NoSA	0.1158	0.045
17	NoSA	-0.2743	-0.4089
18	NoSA	0.2391	0.0323
19	NoSA	-0.1058	-0.0841
20	NoSA	0.2284	-0.0336
21	NoSA	-0.0308	0.1477
22	NoSA	-0.0398	-0.0342
23	NoSA	-0.028	0.1116
24	NoSA	0.0668	-0.0829
25	YesSA	0.138	0.0849
26	NoSA	0.0301	0.182
27	YesSA	0.2129	0.0689
28	YesSA	0.1679	0.0644
29	NoSA	-0.0015	0.1994
30	NoSA	0.1819	0.3001
31	YesSA	-0.2561	-0.1052
32	NoSA	0.005	0.2341
33	YesSA	-0.4225	0.2724
34	NoSA	0.3483	0.2116
35	YesSA	0.0253	-0.0334
36	NoSA	NA	NA
37	NoSA	0.0355	-0.1208
38	YesSA	-0.1688	-0.0569
39	NoSA	0.1162	0.4309
40	NoSA	0.1885	0.15
41	NoSA	-0.002	0.1357
42	NoSA	-0.037	0.1012
43	NoSA	-0.1924	-0.2838
44	NoSA	0.0801	-0.0762
45	NoSA	0.0585	-0.0779
46	NoSA	0.2971	0.3803
47	NoSA	-0.0022	-0.002
48	NoSA	-0.2347	0.2515
49	NoSA	0.118	0.1131
50	NoSA	0.013	-0.0107
51	NoSA	0.1011	0.0491
52	YesSA	-0.0875	-0.1789
53	YesSA	-0.1159	-0.1006
54	NoSA	-0.1815	-0.0065
55	YesSA	0.1148	0.145
56	YesSA	-0.1465	-0.2201
57	YesSA	0.0064	0.1749
58	YesSA	-0.2521	-0.1968
59	NoSA	0.0602	0.1438
60	NoSA	-0.1485	-0.0254
61	NoSA	0.0046	0.3471
62	NoSA	0.0998	0.2534
63	NoSA	0.2648	0.0356
64	YesSA	-0.0118	0.087
65	YesSA	-0.2854	-0.2141
66	YesSA	-0.0734	-0.0452
67	YesSA	-0.1228	-0.1747
68	NoSA	-0.0278	0.1598
69	NoSA	-0.0893	-0.1486
70	YesSA	-0.0603	-0.0827
71	YesSA	-0.0062	-0.2126
72	NoSA	0.1273	0.1698
73	YesSA	0.0535	0.1351
74	NoSA	0.0195	-0.0107
75	YesSA	-0.673	-0.0414
76	YesSA	-0.1076	0.0583
77	YesSA	-0.1014	-0.0508
78	YesSA	-0.3208	-0.3244
79	NoSA	-0.054	0.0491
80	NoSA	-0.0885	0.1135
81	NoSA	0.0639	0.1992
82	NoSA	-0.0448	0.0156
83	YesSA	-0.376	-0.7622
84	NoSA	-0.1618	-0.1251
85	NoSA	NA	NA
86	NoSA	0.1248	5.00E-04
87	NoSA	0.0059	-0.0082
88	YesSA	-0.1524	-0.0235
89	NoSA	0.0277	0.0702
90	YesSA	NA	NA
91	NoSA	0.0222	0.1626
92	NoSA	0.1469	0.4498
93	NoSA	-0.2065	-0.1752
94	YesSA	NA	NA
95	NoSA	-0.1631	-0.1623
96	NoSA	0.2913	0.29
97	NoSA	0.0568	0.2677
98	YesSA	0.0063	0.1112
99	NoSA	-0.0236	0.1217
100	NoSA	0.0242	0.0876
101	NoSA	-0.2343	-0.0152
102	NoSA	-0.0749	0.1438
