# Supplementary material for: Diminished responses to bodily threat and blunted interoception in suicide attempters
Source: eLife journal article supplement (doi:10.7554/elife.51593), 2020-04-07
Supplement: figures [file elife-51593-figures-v2.pdf]

---

## Figures and figure supplements

Diminished responses to bodily threat and blunted interoception in suicide attempters

**Danielle C DeVille et al**

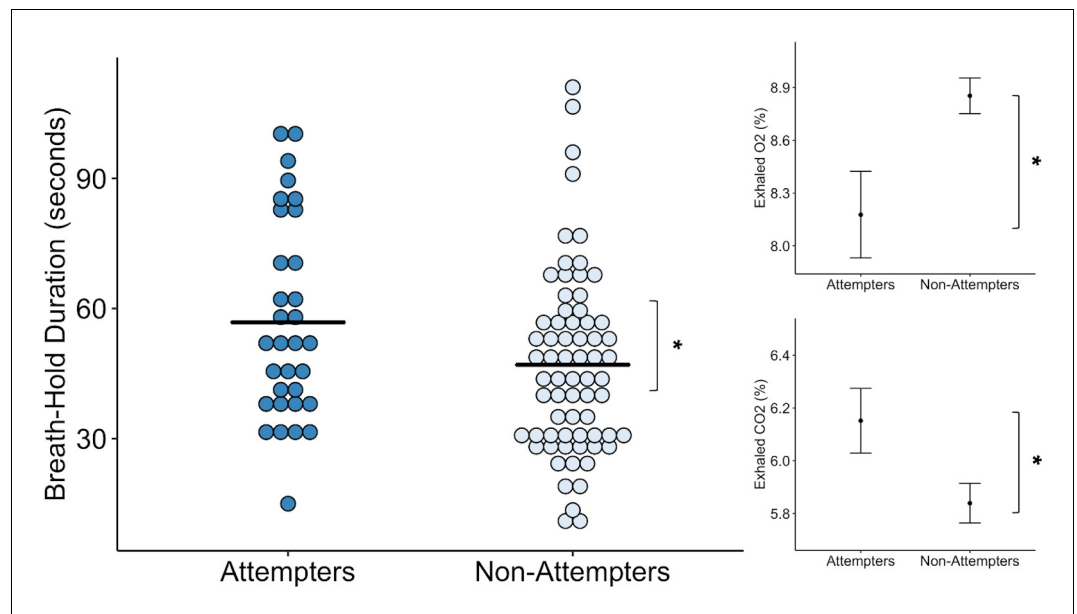

**Figure 1.** Suicide attempters held their breath significantly longer than non-attempters during the inspiratory breath-hold challenge (approximately 10 s on average). They also exhibited greater increases in carbon dioxide (CO<sub>2</sub>) and decreases in oxygen (O<sub>2</sub>). The mean breath-hold duration across the two trials is displayed below. Error bars indicate + / - 1 standard error, \* $p < 0.05$ .

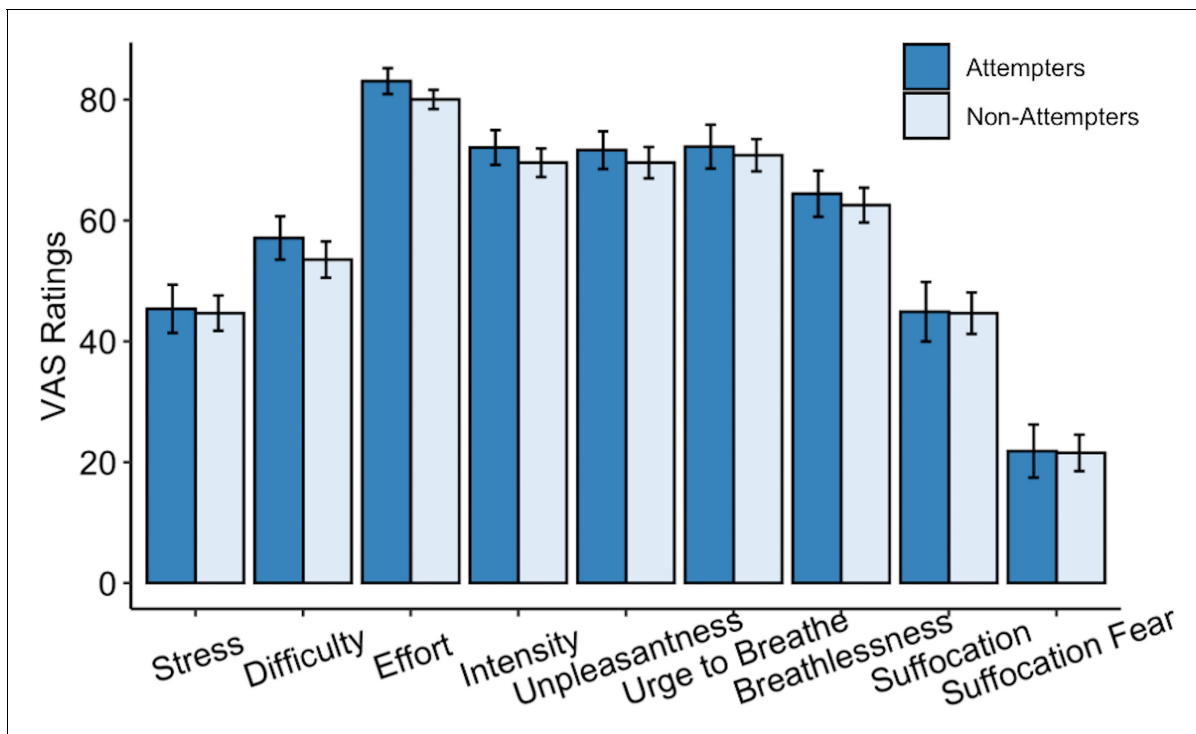

**Figure 1—figure supplement 1** . Suicide attempters and non-attempters exhibited no differences in symptom ratings following the breath hold task.

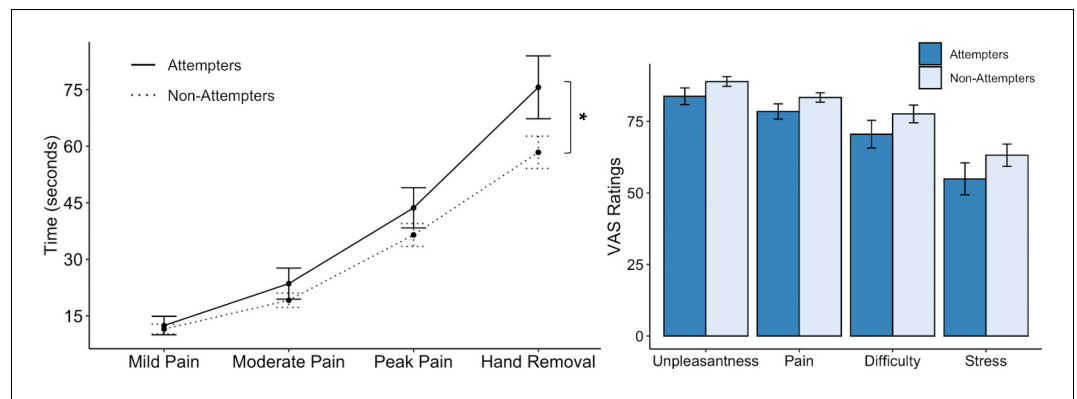

**Figure 2.** Suicide attempters exhibited significantly greater pain tolerance than non-attempters during the cold-pressor challenge. However, they did not significantly differ in their retrospective ratings of overall pain, unpleasantness, difficulty, or stress experienced during the task. Error bars indicate  $\pm 1$  standard error; \* $p < 0.05$ .

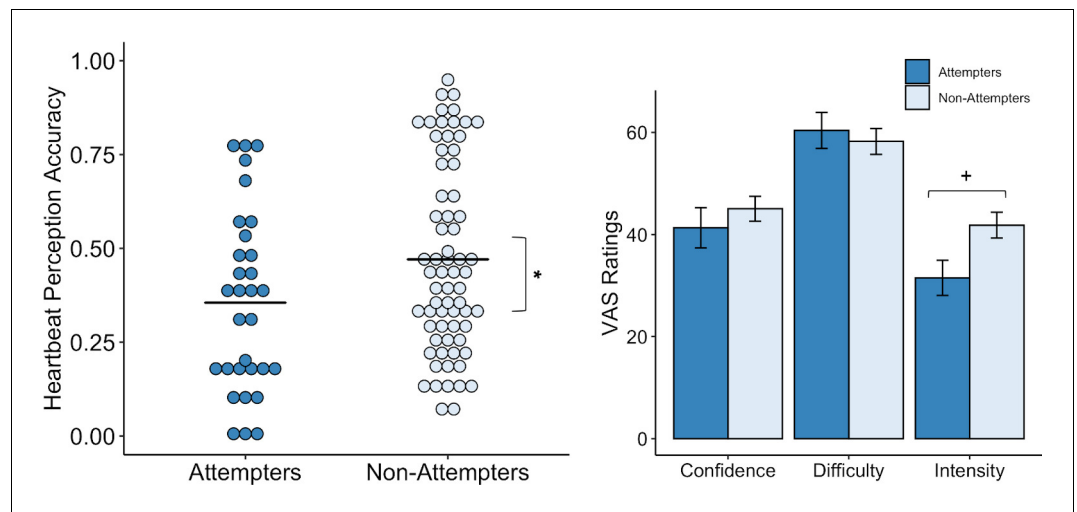

**Figure 3.** Suicide attempters exhibited significantly lower heartbeat perception accuracy than non-attempters during the no-guess and breath-hold perturbation conditions. There were no perceived differences in reported in task difficulty or confidence in performance across the no-guess and perturbation conditions. Suicide attempters also provided lower ratings of heartbeat intensity across these conditions, although this was no longer significant after correction for multiple comparisons. Error bars indicate + / - 1 standard error; \* $p < 0.05$ , + $p < 0.10$ .

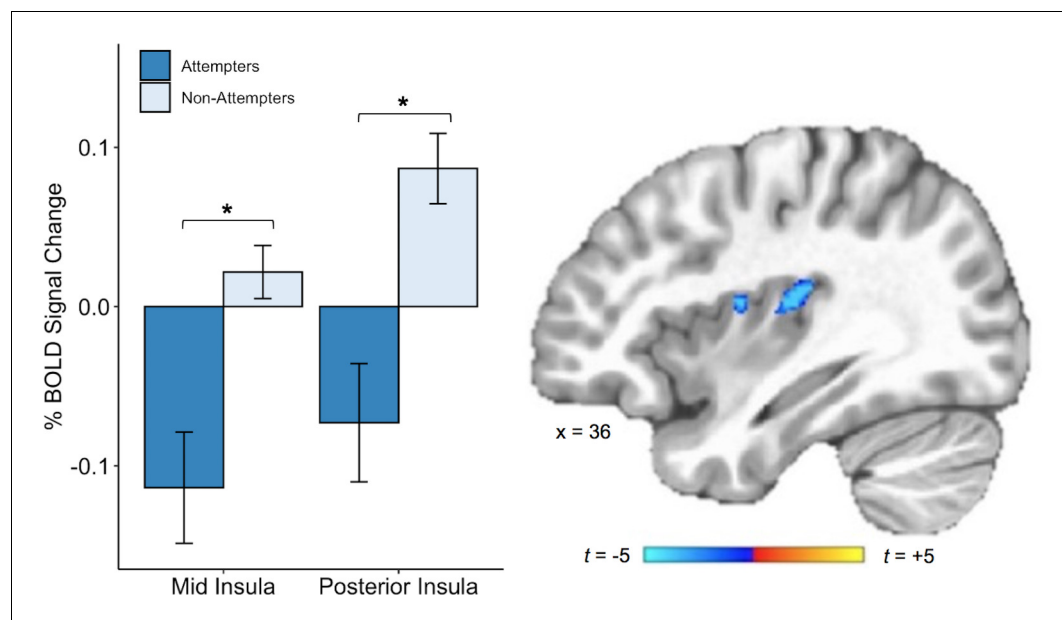

**Figure 4.** Suicide attempters exhibited lower blood oxygen level-dependent (BOLD) signal in the right posterior and mid insula than non-attempters during attention to heartbeat sensations (relative to the exteroceptive condition;  $p < 0.005$ , ACF corrected at  $\alpha < 0.05$ ). Error bars indicate  $\pm 1$  standard error.

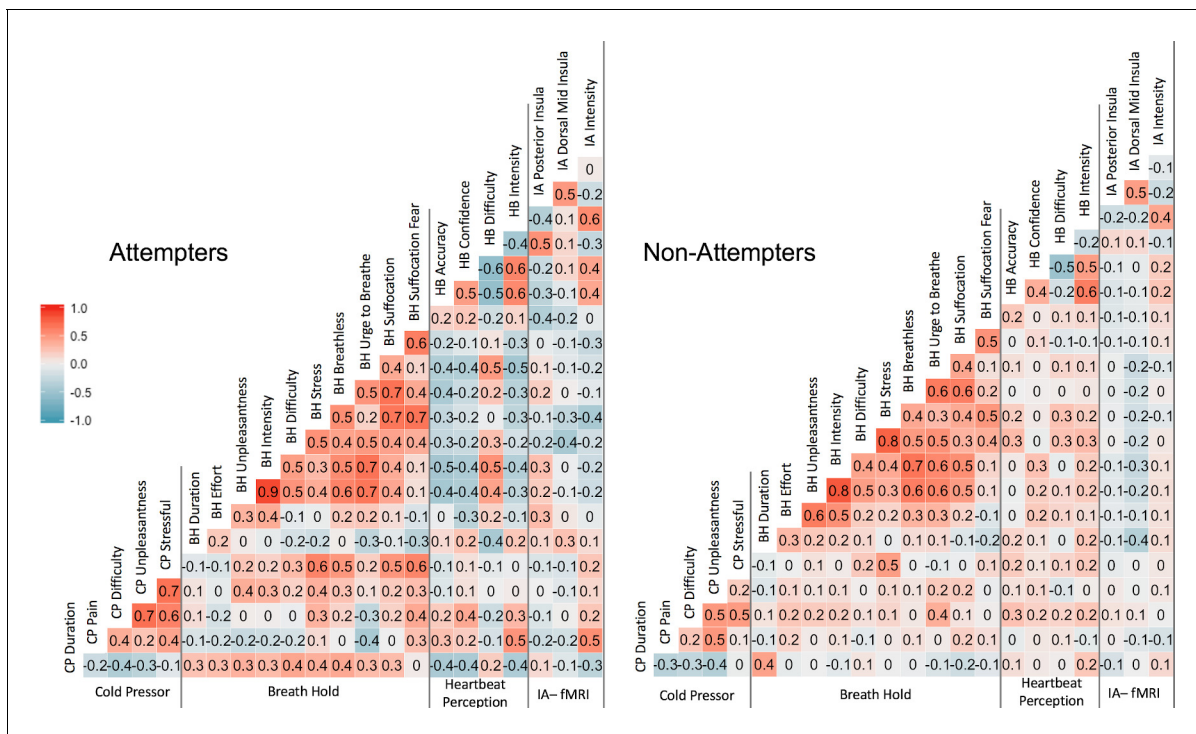

**Appendix 1—figure 1.** Pearson correlation coefficients across measures. ‘CP’ = cold-pressor, ‘BH’ = breath-hold (computed using participants’ mean duration and VAS ratings across trial 1 and trial 2, ‘HB’ = heartbeat perception task (computed using the mean of the no-guess and perturbation conditions). IA-fMRI = interoceptive attention to heartbeat sensations during fMRI.

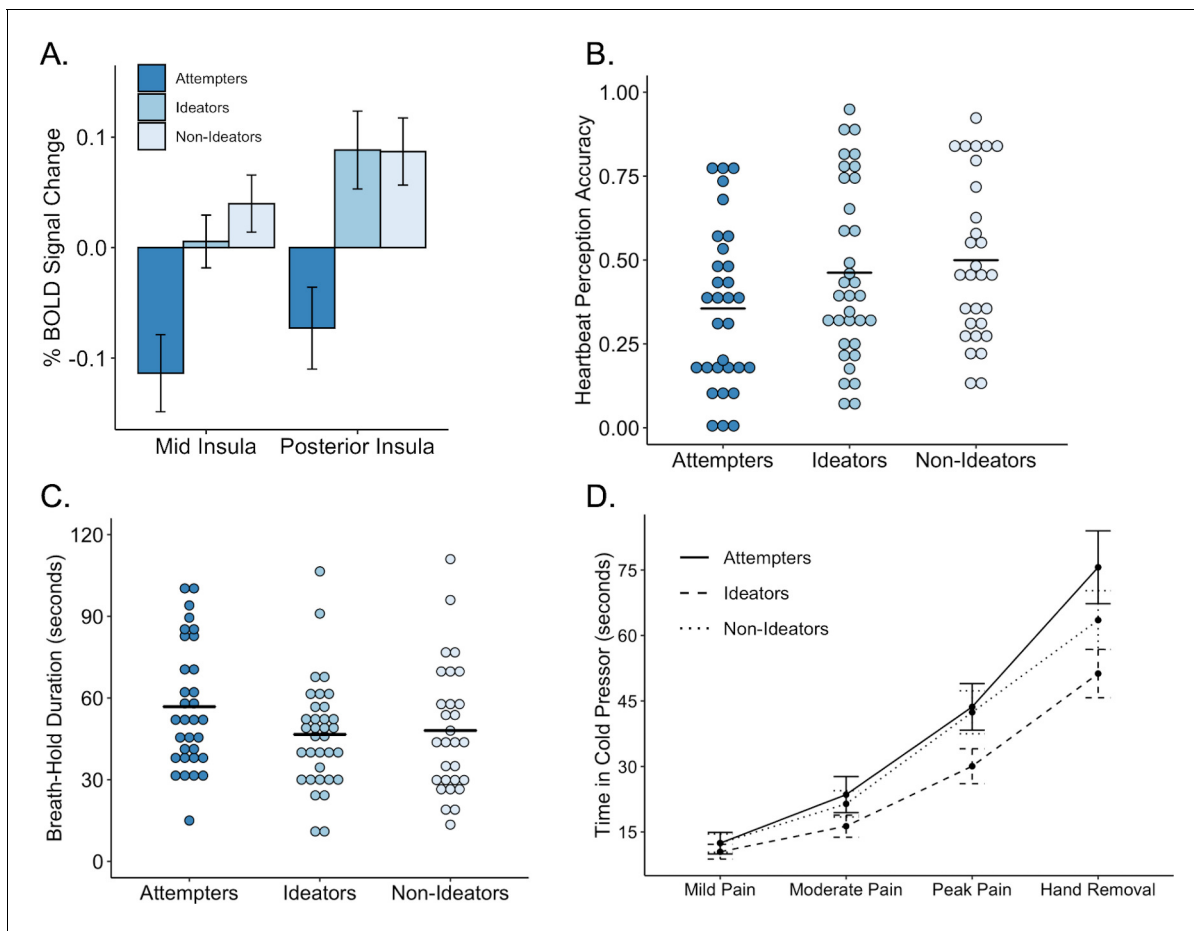

**Appendix 2—figure 1.** Performance on interoceptive measures across three groups: suicide attempters, suicide ideators, and non-ideators. **(A)** During attention to interoceptive sensations (vs. exteroceptive sensations) suicide attempters exhibited lower blood oxygen level-dependent (BOLD) signal in the right dorsal mid insula compared to ideators ( $p = 0.004$ ) and non-ideators ( $p < 0.001$ ). Suicide attempters also exhibited lower BOLD activation in the posterior insula relative to ideators ( $p = 0.001$ ) and non-ideators ( $p = 0.002$ ) during interoceptive attention. **(B)** Suicide attempters exhibited lower levels of heartbeat perception accuracy relative to that of ideators ( $p = 0.012$ ) and non-ideators ( $p = 0.007$ ) during the no-guess and perturbation trials of the heartbeat perception task. The mean of the no-guess and perturbation trials is illustrated. **(C)** There was no significant difference between attempters and ideators ( $p = 0.062$ ), nor between attempters and non-ideators ( $p = 0.110$ ) in breath hold duration across trials. **(D)** Relative to ideators, suicide attempters sustained the cold pressor longer after reaching peak pain ( $p = 0.001$ ); no significant differences were observed between attempters and non-ideators ( $p = 0.074$ ). Error bars indicate + / - 1 standard error.
